# Supplementary material for: Stability of the Plasmodium falciparum AMA1-RON2 Complex Is Governed by the Domain II (DII) Loop
Source: PubMed Central journal article supplement (PMC4701444; doi:10.1371/journal.pone.0144764), 2016-01-05
Supplement: pone.0144764.s001.pdf [file pone.0144764.s001.pdf]

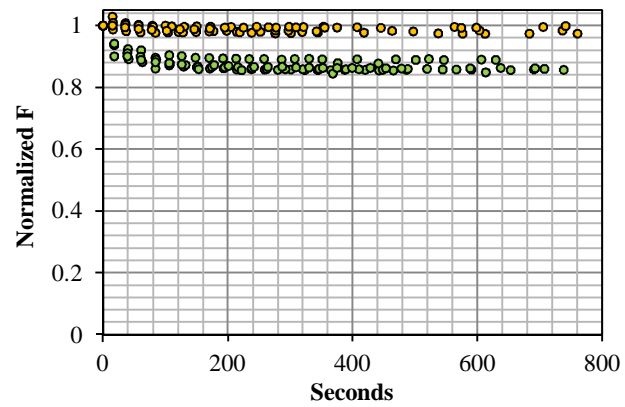

**S1 Figure.** Fluorescence change over time for  $\Delta$ DII-*Pf*AMA1 (gold) and *Pf*AMA1 (green) at concentration of 50 nM reacting with 10 nM of F\**Pf*RON2sp1.
