# Supplementary material for: Stability of the Plasmodium falciparum AMA1-RON2 Complex Is Governed by the Domain II (DII) Loop
Source: PubMed Central journal article supplement (PMC4701444; doi:10.1371/journal.pone.0144764), 2016-01-05

**S2 Figure. Global fitting when assessing a simple reversible reaction model ( $A +$**

$B \xrightleftharpoons[k_2]{k_1} C$ ). The solid black lines are the globally fitted data according to a non-intermediate model (eqn 3) for *Pf*AMA1-F\**Pf*RON2sp1 (**A, B**) and  $\Delta$ DII-*Pf*AMA1-F\**Pf*RON2sp1 (**C, D**) at 20 °C (blue), 25 °C (yellow) and 30 °C (red).

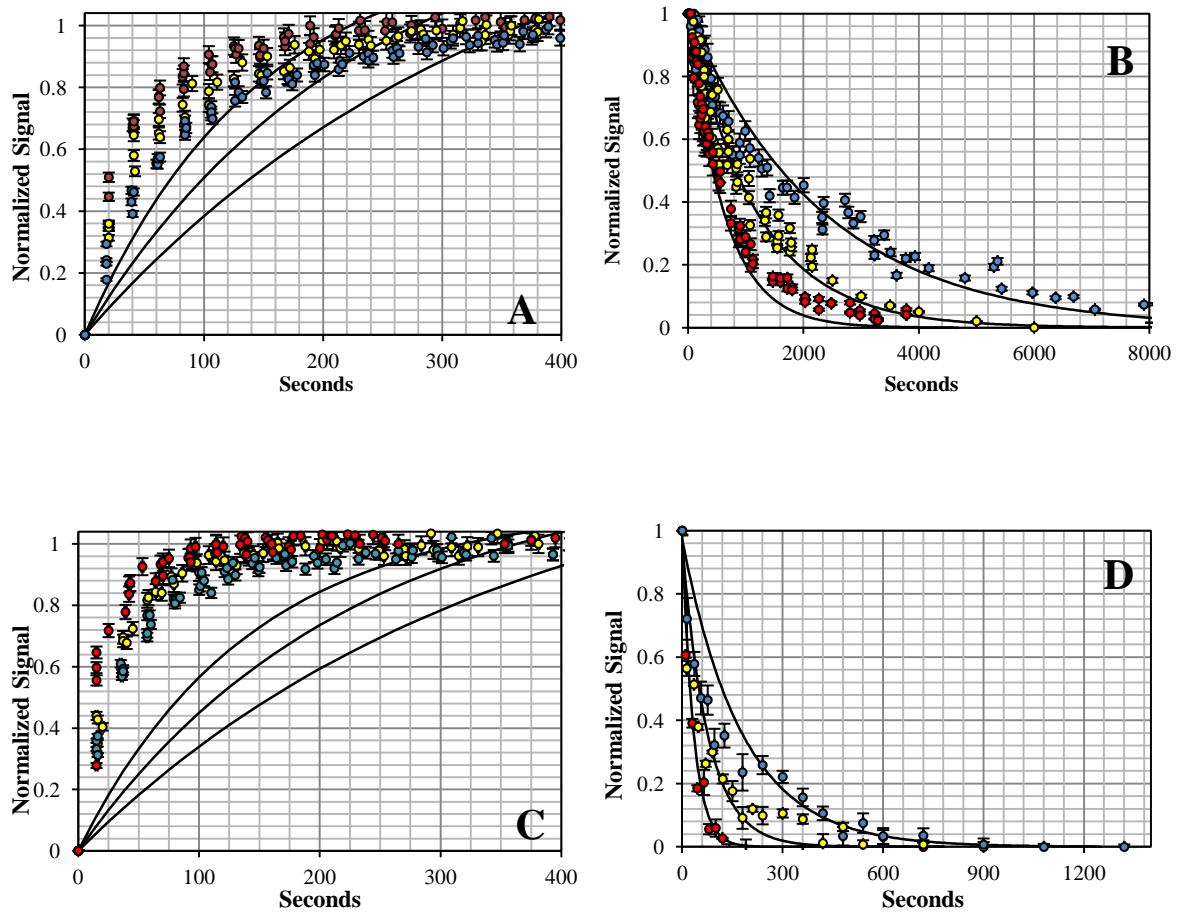

Supplement: pone.0144764.s002.pdf [file pone.0144764.s002.pdf]
