# Supplementary material for: Stability of the Plasmodium falciparum AMA1-RON2 Complex Is Governed by the Domain II (DII) Loop
Source: PubMed Central journal article supplement (PMC4701444; doi:10.1371/journal.pone.0144764), 2016-01-05

**S3 Figure. Global fitting when assessing an interconversion model:**

$(A_{inactive} \xrightleftharpoons[k_2]{k_1} A_{active}^* + B \xrightleftharpoons[k_4]{k_3} C)$ . The solid black lines are the globally fitted data according to an interconversion model (eqn 5) for *Pf*AMA1-F\**Pf*RON2sp1 (**A, B**) and  $\Delta$ DII-*Pf*AMA1-F\**Pf*RON2sp1 (**C, D**) at 20 °C (blue), 25 °C (yellow) and 30 °C (red).

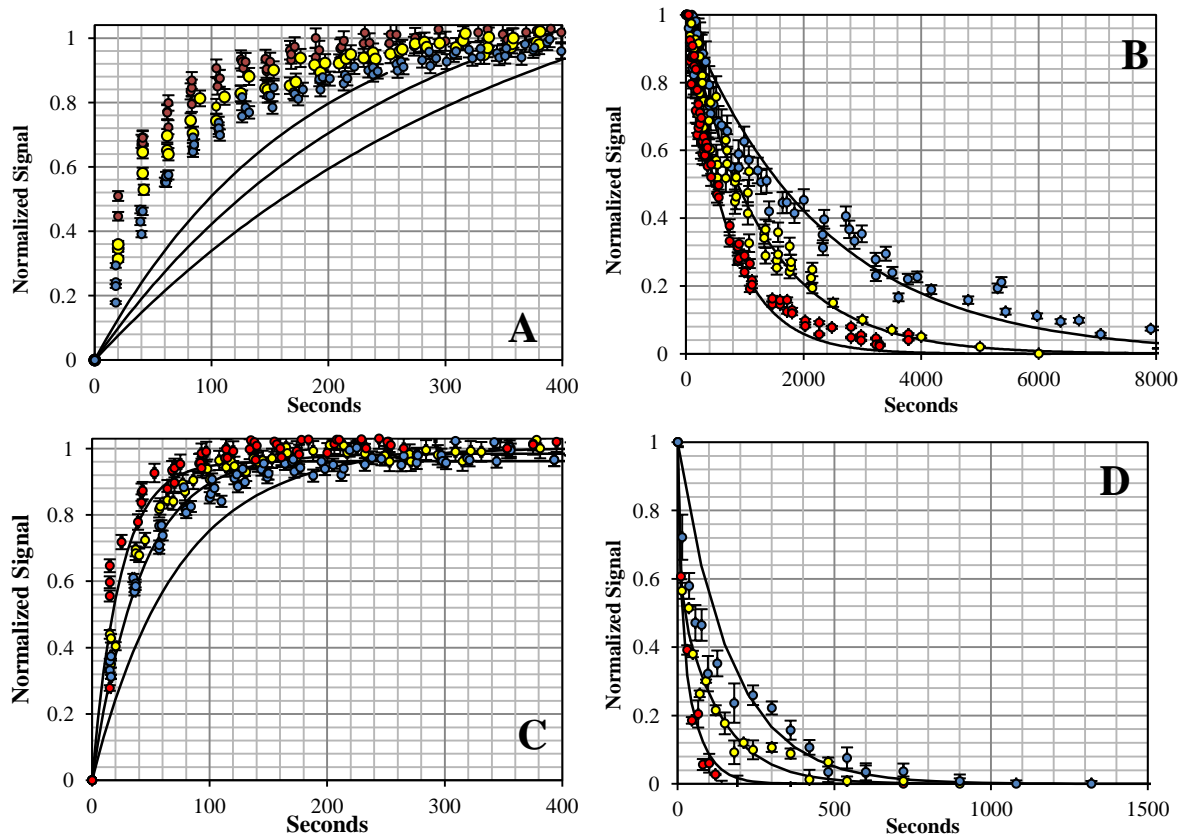

Supplement: pone.0144764.s003.pdf [file pone.0144764.s003.pdf]
