# Supplementary material for: Stability of the Plasmodium falciparum AMA1-RON2 Complex Is Governed by the Domain II (DII) Loop
Source: PubMed Central journal article supplement (PMC4701444; doi:10.1371/journal.pone.0144764), 2016-01-05
Supplement: pone.0144764.s005.pdf [file pone.0144764.s005.pdf]

**S1 Text. Fluorescence-based experiments.** Anisotropy ( $r$ , eqn S1-1) and polarization ( $P$ , eqn S1-2) fluorescence methods measure the rotational mobility of the dye and labeled biomolecule.<sup>1</sup> Anisotropy in contrast to polarization is normalized by the total fluorescence intensity (eqn S1-3). The term  $G$  (eqn S1-4) is the correction factor due to differences in sensitivities of the photomultiplier tube (PMT) to vertical or horizontal light. In our instrument, the excitation light is provided by a xenon arc lamp filtered through an excitation polarizer and the emission signal is collected by an analyzer set at vertical  $I_{\parallel}$  or horizontal position  $I_{\perp}$ .

$$r = \frac{I_{\parallel} - G * I_{\perp}}{I_{\parallel} + 2 G * I_{\perp}} \quad \text{eqn S1-1}$$

$$P = \frac{I_{\parallel} - G * I_{\perp}}{I_{\parallel} + G * I_{\perp}} \quad \text{eqn S1-2}$$

$$F = I_{\parallel} + 2 G * I_{\perp} \quad \text{eqn S1-3}$$

where

$$G = \frac{I_{\parallel}}{I_{\perp}} \quad \text{eqn S1-4}$$

$$r(t) = \frac{\sum x_i(t) * QY_i * r_i}{F(t)} \quad \text{eqn S1-5}$$

$$rF(t) = \sum x_i(t) QY_i r_i \quad \text{eqn S1-6}$$

Anisotropy is preferred as it correctly tracks the molecular species formation when fluorescence changes are small<sup>2</sup>. However, if the change in fluorescence is significant (e.g. fluorescence quenching), the reactions have to be followed by the product of the two signals:  $rF(t)$  (eqn S1-6) in order to track the chemical species ( $x_i$ ) and the respective quantum yields ( $QY_i$ ) to elucidate the reaction mechanism. In practice, if  $F$  is constant or very small (less than 25%), the  $r$  and  $rF$  signals are almost equivalent, and  $r$  can be used to simplify the analysis. The fluorescence change of  $\Delta$ DII-*Pf*AMA1 and *Pf*AMA1 reacting with the F\**Pf*/RON2sp1 showed very little fluorescence quenching (S1 Fig).

## References

1. Lakowicz, J. R., *Principles of Fluorescence Spectroscopy* 3rd ed.; Springer Singapore, p 353-358, 2006; p 954.
2. Otto, M. R.; Lillo, M. P.; Beechem, J. M., Resolution of multiphasic reactions by the combination of fluorescence total-intensity and anisotropy stopped-flow kinetic experiments. *Biophys. J.* **1994**, 67, (6), 2511-2521.
